# Supplementary material for: Comprehensive analysis of abnormal expression, prognostic value and oncogenic role of the hub gene FN1 in pancreatic ductal adenocarcinoma via bioinformatic analysis and in vitro experiments
Source: PeerJ. 2021 Sep 6;9:e12141. doi: 10.7717/peerj.12141 (PMC8428264; doi:10.7717/peerj.12141)
Supplement: Supplemental Information 2 [file peerj-09-12141-s002.xlsx]

## Sheet: Figure8A
		2^-ΔΔCT
PANC1	NC	1.06683	0.974905	0.961483
	si-1	0.260616	0.258816	0.279322
	si-2	0.430276	0.390483	0.421421
	si-3	0.375443	0.443396	0.309212
SW1990	NC	1.18921	0.913831	0.920188
	si-1	0.370274	0.399611	0.41658
	si-2	0.0894154	0.0822789	0.109323
	si-3	0.522439	0.540862	0.616996

## Sheet: Figure8B
		Absorbance (450nm)
PANC1	Days	si-NC			si-1			si-2
	0	0.24	0.265	0.263	0.198	0.278	0.278	0.213	0.219	0.241
	1	0.329	0.309	0.296	0.305	0.375	0.366	0.257	0.239	0.251
	2	0.412	0.452	0.443	0.409	0.318	0.361	0.281	0.295	0.314
	3	0.669	0.645	0.713	0.513	0.522	0.478	0.392	0.419	0.312
SW1990	Days	si-NC			si-1			si-2
	0	0.287	0.298	0.325	0.29	0.294	0.274	0.236	0.269	0.236
	1	0.445	0.542	0.459	0.487	0.524	0.516	0.265	0.307	0.332
	2	1.234	1.31	1.453	0.815	0.988	0.877	0.39	0.444	0.411
	3	1.488	1.709	1.535	1.243	1.337	1.351	0.761	0.655	0.622

## Sheet: Figure8C
	cell number
	NC	si-1	si-2
PANC1	565	258	225
	523	205	237
	517	223	210
SW1990	833	533	332
	805	485	368
	786	562	319

## Sheet: Figure8D E
		cell number					cell number					cell number
		Hochest	EdU	EdU+ rate			Hochest	EdU	EdU+ rate			Hochest	EdU	EdU+ rate
PANC1	NC	53	30	0.566038		si-1	41	11	0.268293		si-2	83	28	0.337349
	NC	52	29	0.557692		si-1	53	15	0.283019		si-2	69	21	0.304348
	NC	56	30	0.535714		si-1	50	11	0.22		si-2	67	21	0.313433
SW1990	NC	112	60	0.535714		si-1	64	24	0.375		si-2	193	76	0.393782
	NC	123	65	0.528455		si-1	156	50	0.320513		si-2	315	129	0.409524
	NC	239	128	0.535565		si-1	285	123	0.431579		si-2	320	129	0.403125

## Sheet: Figure8F
PANC1		G1	S	G2		SW1990		G1	S	G2
	NC	51.36	35.58	13.07			NC	34.13	38.25	27.62
		50.3	37.6	12.1				35.27	37.59	27.14
		51.39	36.59	12.03				34.34	37.99	27.68
	si-1	59.92	33.39	6.69			si-1	46.96	35.64	17.39
		58.52	36.42	5.07				48.42	34.42	17.15
		59.27	36.71	4.02				47.74	34.97	17.3
	si-2	64.36	28.46	7.18			si-2	54.09	29.32	16.59
		63.35	31.63	5.02				54.42	28.1	17.47
		64.35	30.38	5.27				54.66	27.69	17.65
